# Supplementary material
Source: PubMed Central journal article supplement (PMC6055167)
Supplement: pnas.1721189115.sapp.pdf [file pnas.1721189115.sapp.pdf]

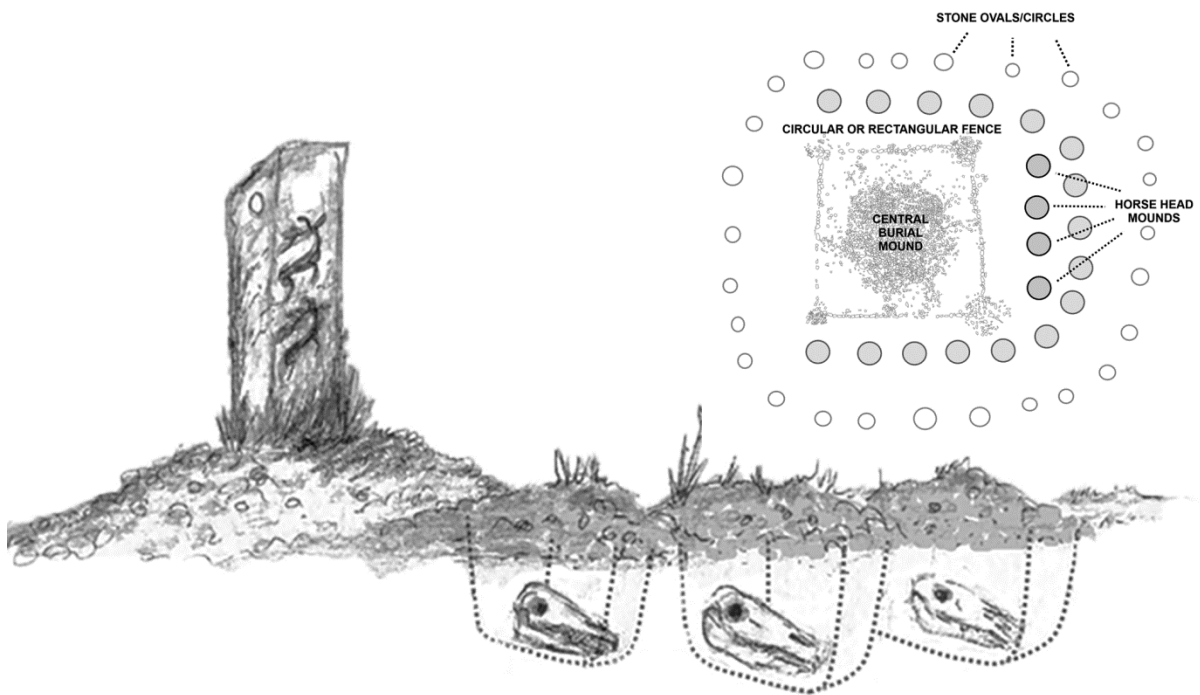

Figure S1. Sketch drawing of a deer stone and associated horse burials (lower left), and a birds-eye planview of a *khirigsuur* burial mound surrounded by horse burials (upper right). Drawing by Barbara Morrison.

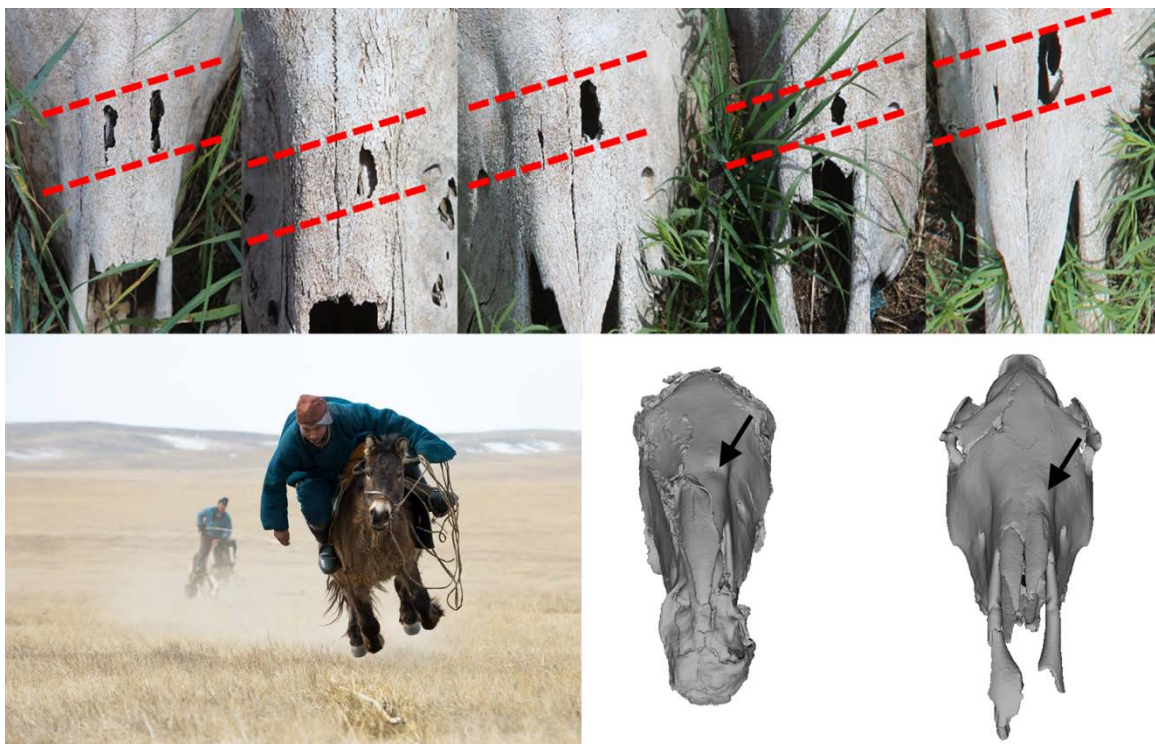

Figure S2. A (top): Contemporary Mongolian herder engaged in horseback riding, using left-handed rein position causing asymmetric pressures to the horse's skull. Photo by Orsoo Bayarsaikhan. B(center) contemporary Mongolian horse skulls, showing asymmetric and skewed thinning to the nasal bones caused by bridle pressure. C(bottom) Asymmetric deformation to the cranial bones of a Deer Stone-Khirigsuur horse (left), alongside an early Middle Ages horse with a similar feature (right). Modified from Taylor and Tuvshinjargal (2018).

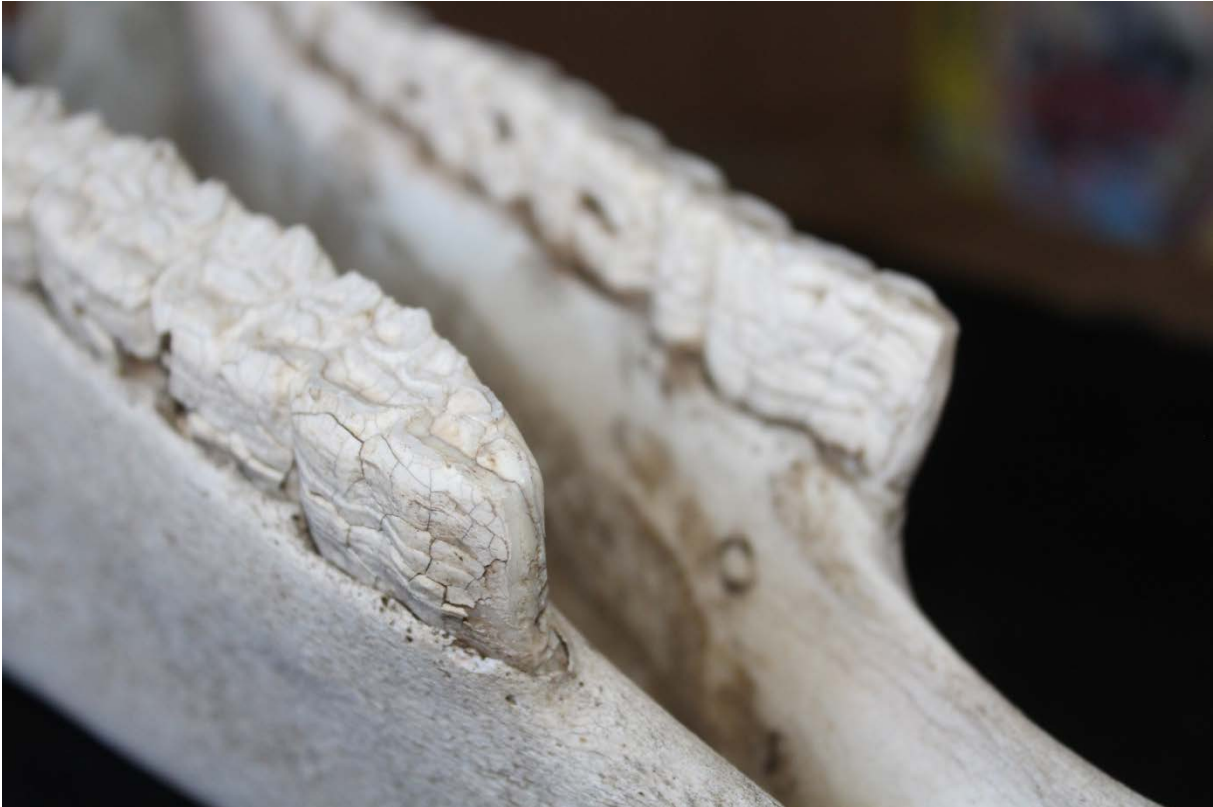

Figure S3. Damaged anterior margin of the lower second premolar on a contemporary Mongolian horse, caused by interaction with the bit during riding (Anthony and Brown 2003; Bendrey 2007).

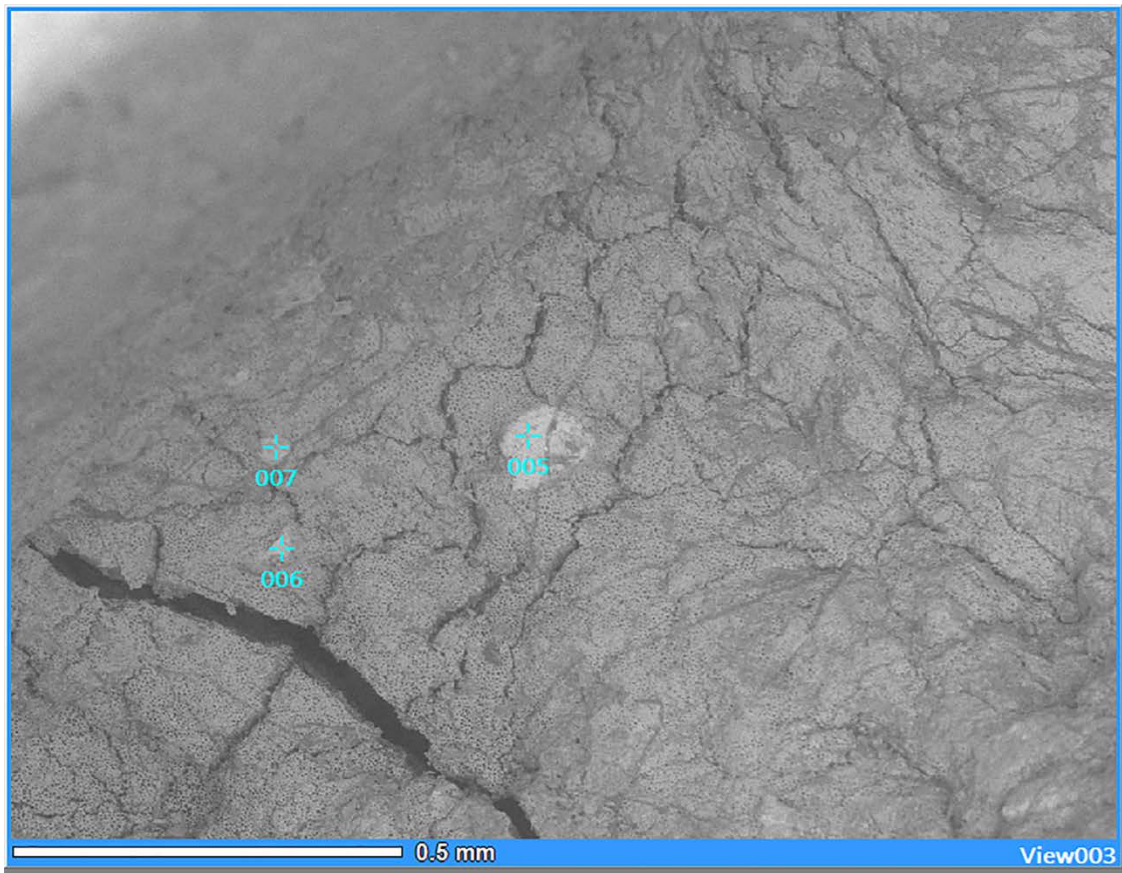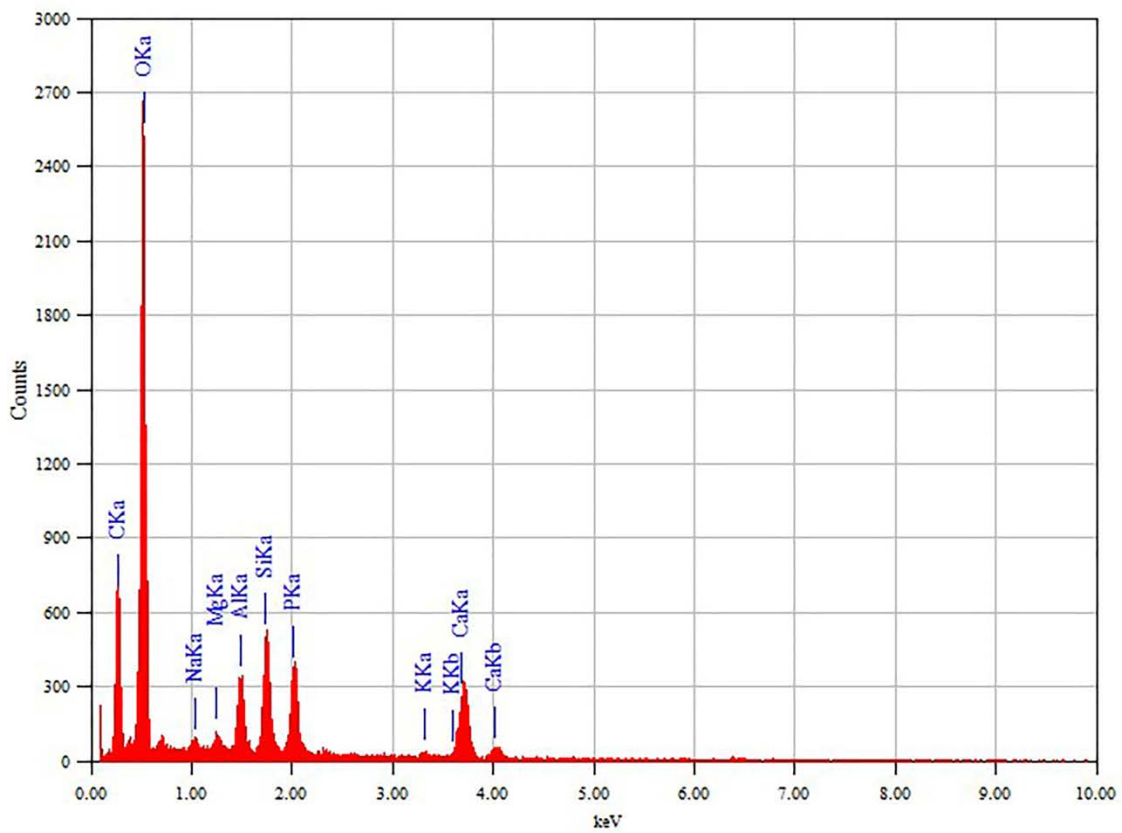

Figure S4. A (Top) SEM photomicrograph showing modified I1 margin from Uguumur. B (center) Example of particles targeted for EDS analysis on the interior cut surface of a modified tooth from Uguumur. C (bottom) Spectra from one of the particles analyzed, showing energy level (kiloelectron volts) versus counts received and processed by the detector, labeled with associated elements.

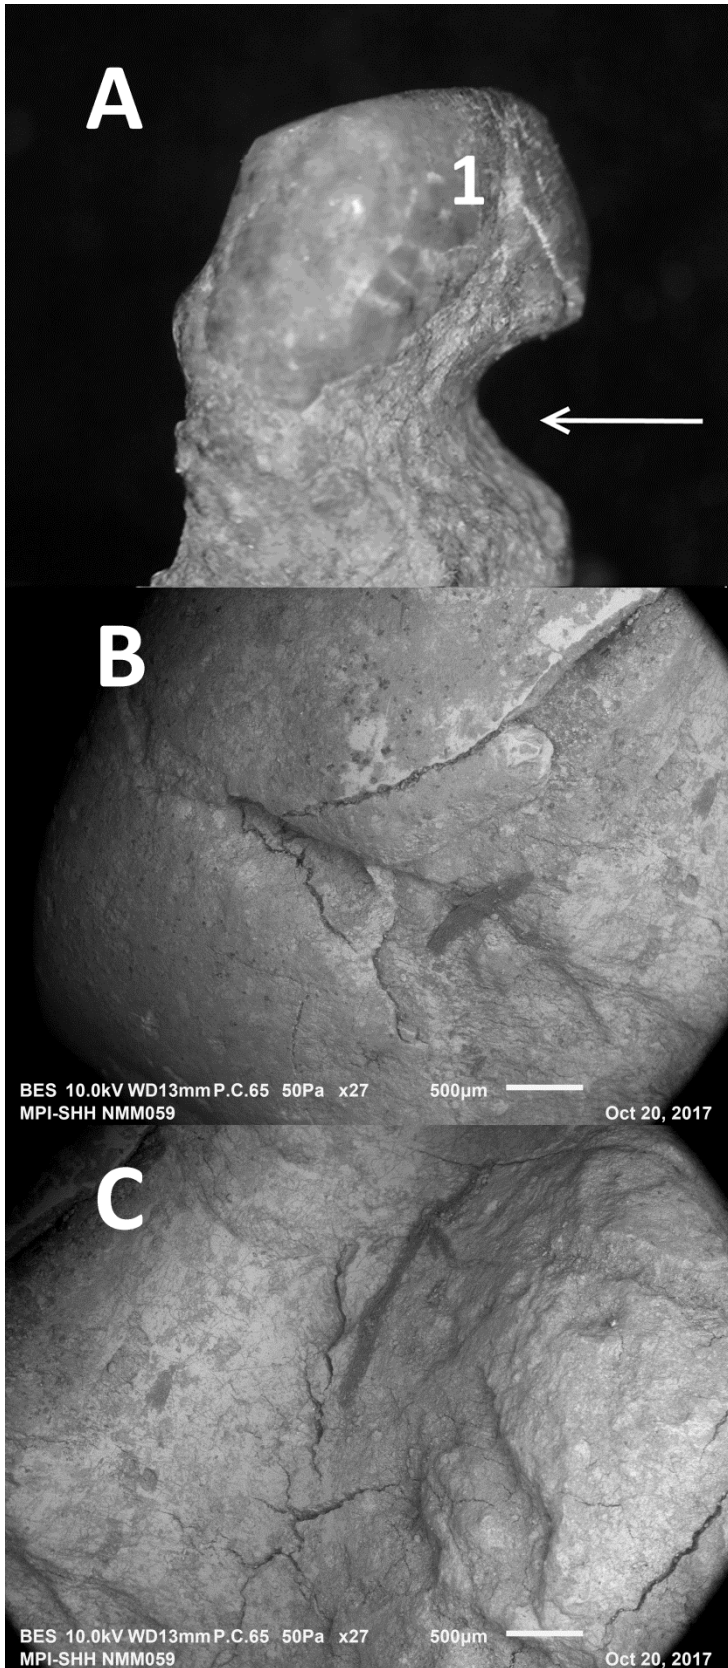

Figure S5. A (top): Photomicrograph showing modified margin of retained deciduous I1 fragment from Khirigsuur 075 at Egiin Gol, showing notched and slab-fractured exterior tooth margin(1), as well as the angle of groove formation/cutting (arrow) under 20x magnification. B (center), shows the same tooth's slab fracture of enamel plate caused by perpendicular impact, and C (bottom), closeup under SEM showing rounded morphology)

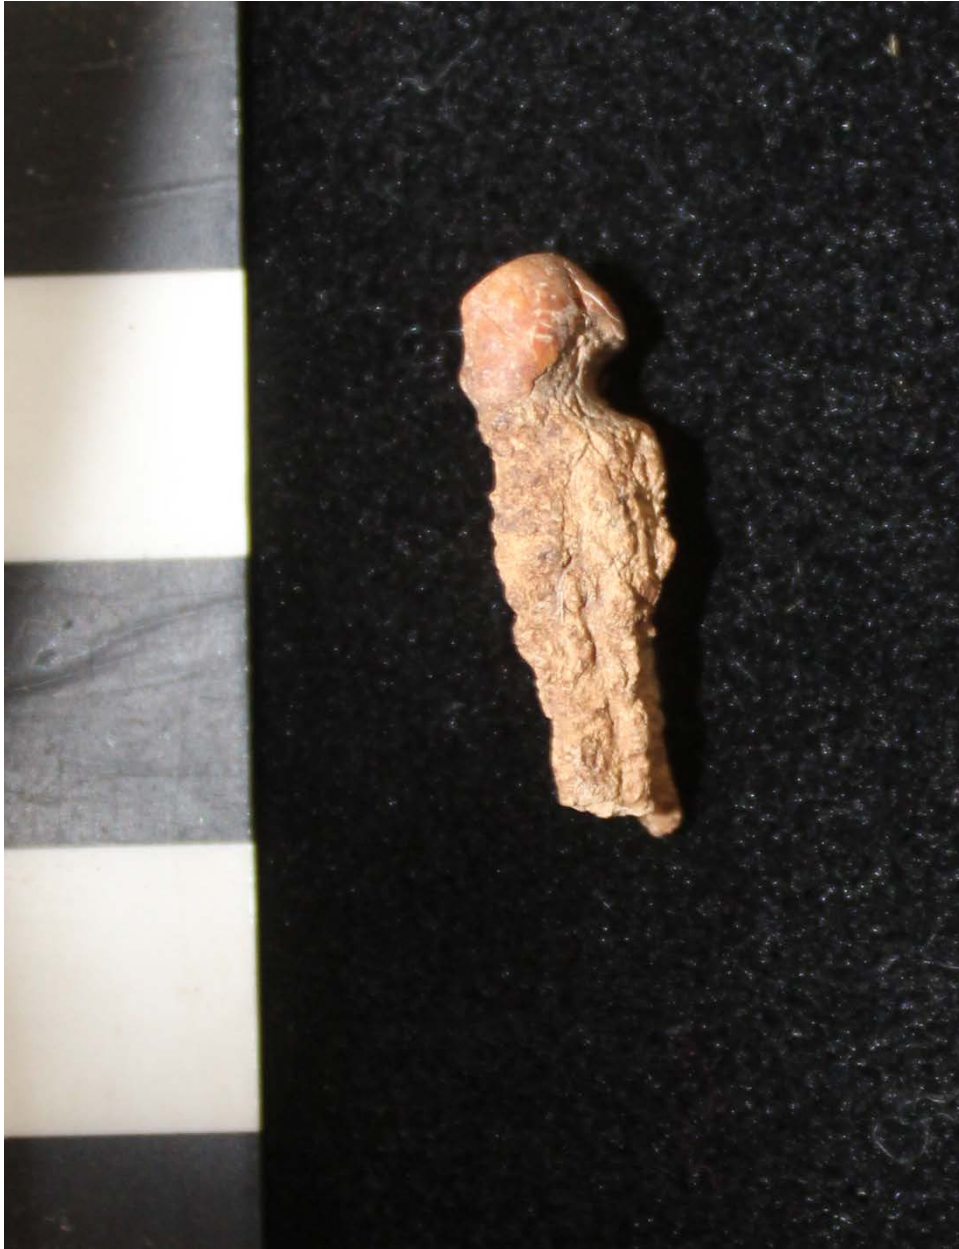

Figure S6. Anterior view of tooth from Egiin Gol, showing lateral location of the surficial modification. View from the anterior (labial) direction.

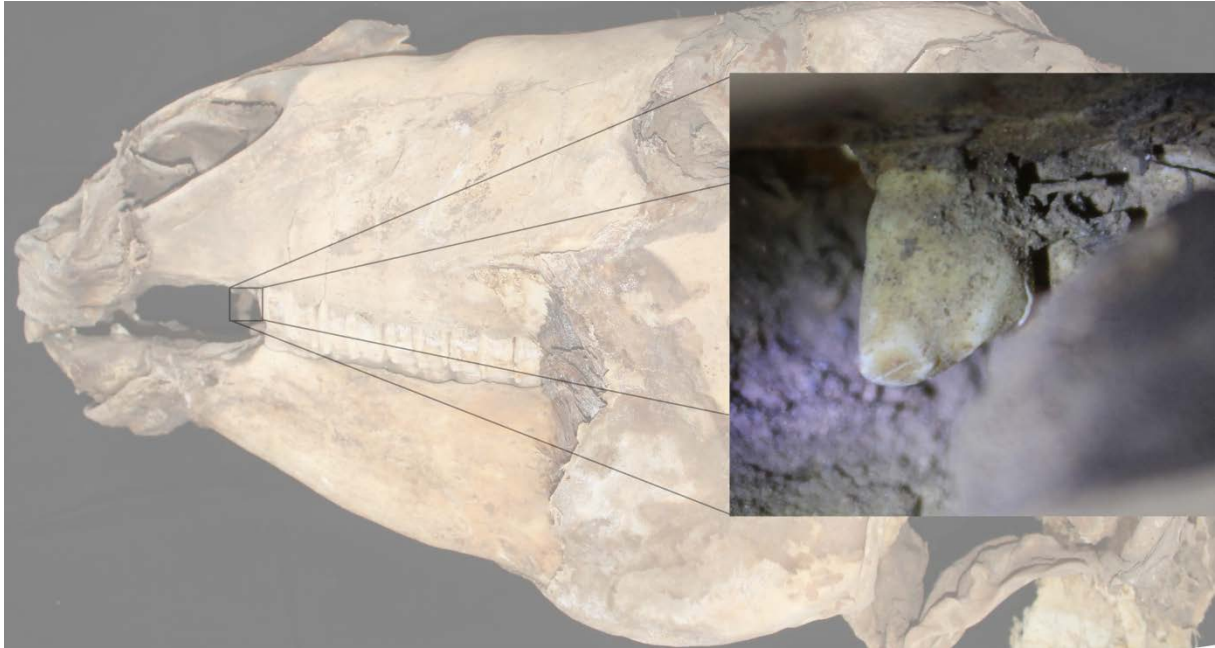

Figure S7. Damage to the retained wolf tooth in a 4-5 year old mummified horse, dating to the 2-4<sup>th</sup> centuries CE from the site of Urd Ulaan-Uneet in western Mongolia.

Table S1. Specimens used in analysis, along with taphonomic and dental data. Legend: (+) = present, (-) = absent, L = left, R = right, LP2 = lower second premolar, UP 2 = upper second premolar, LL = Lower Left, LR = Lower Right, UL = Upper Left, UR = Upper Right, morph. = morphology, indet. = indeterminate, juv. = juvenile

| Specimen (reference #)                                             | Cultural affiliation/period                      | Estimated age, yrs. (basis)       | Estimated sex | Wolf tooth?     | Taphonomic notes                       | Evidence for healing? |
|--------------------------------------------------------------------|--------------------------------------------------|-----------------------------------|---------------|-----------------|----------------------------------------|-----------------------|
| Khuvsgul, Tsagaan Uul sum, Khushuutin Gol DS Feature 2 (001)       | Bronze Age, 1200-700 BCE (Deer Stone/Khirigsuur) | 14-20+ (crown height)             | Likely male   | Indet.          |                                        |                       |
| Khuvsgul, Tsagaan Uul sum, Bor Hujiriin Gol 1 Feature 2 (002)      | Bronze Age, 1200-700 BCE (Deer Stone/Khirigsuur) | 14-15 (crown height)              | Indet.        | Indet.          |                                        |                       |
| Khuvsgul, Tsagaan Uul sum, Khushuutin Gol DS Feature 3 (003)       | Bronze Age, 1200-700 BCE (Deer Stone/Khirigsuur) | 20+ (crown height, incisor morph) | Likely male   | Absent          |                                        |                       |
| Bayan Ulgii, Tsengel sum, On Khad KS (008)                         | Bronze Age, 1200-700 BCE (Deer Stone/Khirigsuur) | 6-7 (incisor morph)               | Male          | Absent          |                                        |                       |
| Khuvsgul, Renchinlkhumbe sum, Tsatstain Khushuu DS Feature 2 (009) | Bronze Age, 1200-700 BCE (Deer Stone/Khirigsuur) | 20+ (crown height)                | Male          | Absent          |                                        |                       |
| Khuvsgul, Renchinlkhumbe sum, Tsatstain Khushuu DS Feature 1 (010) | Bronze Age, 1200-700 BCE (Deer Stone/Khirigsuur) | 2-2.5 (eruption)                  | Indet. (Juv.) | Present (upper) | Mostly complete (UR area unassessable) |                       |
| Zavkhan, Telmen sum, Uguumur DS2 F1 (014)                          | Bronze Age, 1200-700 BCE (Deer Stone/Khirigsuur) | 2-2.5 (eruption)                  | Indet. (Juv.) | Present (upper) | Mostly complete (UL area unassessable) |                       |
| Zavkhan, Telmen sum, Uguumur DS 8 (015)                            | Bronze Age, 1200-700 BCE (Deer Stone/Khirigsuur) | 2-2.5 (eruption)                  | Indet. (Juv.) | Present (upper) | Mostly complete (UR area unassessable) |                       |
| Zavkhan, Shiluustei sum, Daagan                                    | Bronze Age, 1200-700 BCE (Deer Stone/Khirigsuur) | 20+ (crown height)                | Female        | Indet.          |                                        |                       |

|                                                                                           |                                                           |                            |                  |                     |                                                 |    |
|-------------------------------------------------------------------------------------------|-----------------------------------------------------------|----------------------------|------------------|---------------------|-------------------------------------------------|----|
| Del DS (016)                                                                              | Stone/Khirigsuur)                                         | incisor<br>morph)          |                  |                     |                                                 |    |
| Khuvsugul,<br>Alag-Erdene<br>sum, Ulaan<br>Tolgoi DS 4<br>feature 6<br>(017)              | Bronze Age,<br>1200-700 BCE<br>(Deer<br>Stone/Khirigsuur) | 11-18<br>(crown<br>height) | Likely<br>male   | Indet.              |                                                 |    |
| Khuvsugul,<br>Alag-Erdene<br>sum, Ulaan<br>Tolgoi DS 4<br>feature 5<br>(018)              | Bronze Age,<br>1200-700 BCE<br>(Deer<br>Stone/Khirigsuur) | 1-2<br>(eruption)          | Indet.<br>(Juv.) | Present<br>(upper)  | Mostly<br>complete (UL<br>area<br>unassessable) |    |
| Tuv, Zaamar<br>sum, Ulaan<br>Khadnii Am<br>40 feature 3<br>(020)                          | Bronze Age,<br>1200-700 BCE<br>(Deer<br>Stone/Khirigsuur) | 10-12<br>(crown<br>height) | Indet.           | Indet.              |                                                 |    |
| Tuv, Zaamar<br>sum, Ulaan<br>Khadnii Am<br>AD 40<br>feature 1<br>(021)                    | Bronze Age,<br>1200-700 BCE<br>(Deer<br>Stone/Khirigsuur) | ~2<br>(eruption)           | Indet.           | Indet.              |                                                 |    |
| Tuv, Zaamar<br>sum, Ulaan<br>Khadnii Am<br>AD 40<br>feature 4<br>(022)                    | Bronze Age,<br>1200-700 BCE<br>(Deer<br>Stone/Khirigsuur) | 10-14<br>(crown<br>height) | Indet.           | Indet.              |                                                 |    |
| Tuv, Zaamar<br>sum, Ulaan<br>Khadnii Am<br>AD 40<br>feature<br>5(023)                     | Bronze Age,<br>1200-700 BCE<br>(Deer<br>Stone/Khirigsuur) | 11-15<br>(crown<br>height) | Male             | Indet.              |                                                 |    |
| Arkhangai,<br>Undur-Ulaan<br>sum,<br>Jargalantyn<br>Am F 5 2011<br>Khanui<br>Valley (024) | Bronze Age,<br>1200-700 BCE<br>(Deer<br>Stone/Khirigsuur) | ~0.75<br>(eruption)        | Indet.           | Indet.              |                                                 |    |
| Arkhangai,<br>Undur-Ulaan<br>sum,<br>Jargalantyn<br>Am F4 2011<br>Khanui<br>Valley (025)  | Bronze Age,<br>1200-700 BCE<br>(Deer<br>Stone/Khirigsuur) | 8-13<br>(crown<br>height)  | Indet.           | Indet.              |                                                 |    |
| Arkhangai,<br>Undur-Ulaan<br>sum, Urt<br>Bulagyn<br>KYRI-22<br>(026)                      | Bronze Age,<br>1200-700 BCE<br>(Deer<br>Stone/Khirigsuur) | 2-2.5<br>(crown<br>height) | Indet.           | Indet.              |                                                 |    |
| Khuvsugul,<br>Alag-Erdene<br>sum, Ulaan                                                   | Bronze Age,<br>1200-700 BCE<br>(Deer                      | ~8 (incisor<br>morph)      | Male             | Alveolus<br>(upper) | Broken and<br>possibly fell<br>out, specimen    | NA |



|                                                                          |                                                  |                      |             |                 |  |                                     |
|--------------------------------------------------------------------------|--------------------------------------------------|----------------------|-------------|-----------------|--|-------------------------------------|
| Tolgoi DS 5 feature 2 (027)                                              | Stone/Khirigsuur)                                |                      |             |                 |  | could not be relocated to clarify   |
| Khuvsgul, Renchinlkhumbe sum, Zeerdegchingiin Khushuu KS F1 (028)        | Bronze Age, 1200-700 BCE (Deer Stone/Khirigsuur) | 11-12 (crown height) | Male        | Absent          |  |                                     |
| Khuvsgul, Galt sum, Nukhtiin Am Mound 1 feature 1 (029)                  | Bronze Age, 1200-700 BCE (Deer Stone/Khirigsuur) | 7-9 (crown height)   | Male        | Indet.          |  |                                     |
| Arkhangai, Undoor Ulaan sum, Urt Bulagyn KS KYRI 21 (030)                | Bronze Age, 1200-700 BCE (Deer Stone/Khirigsuur) | 11-16 (crown height) | Male        | Absent          |  |                                     |
| Khuvsgul, Galt sum, Nukhtiin Am Deer Stone Site Feature 1 (031)          | Bronze Age, 1200-700 BCE (Deer Stone/Khirigsuur) | 11-13 (crown height) | Likely male | Indet.          |  |                                     |
| Khuvsgul, Alag-Erdene sum, Ulaan Tolgoi Deer Stone 5 Feature 3, L2 (032) | Bronze Age, 1200-700 BCE (Deer Stone/Khirigsuur) | ~0.5 (eruption)      | Indet.      | Present (upper) |  | Badly damaged, only UR area visible |
| Khuvsgul, Alag-Erdene sum, Ulaan Tolgoi Deer Stone 5 feature 4 (033)     | Bronze Age, 1200-700 BCE (Deer Stone/Khirigsuur) | ~0.5 (eruption)      | Indet.      | Indet.          |  |                                     |
| Khuvsgul, Tumurbulag sum, Zunii Gol A1F3 (034)                           | Bronze Age, 1200-700 BCE (Deer Stone/Khirigsuur) | 11-14 (crown height) | Indet.      | Absent          |  |                                     |
| Bulgan, Khutag-Undur sum, Uurgiin Gol 4 1-064-03 (035)                   | Bronze Age, 1200-700 BCE (Deer Stone/Khirigsuur) | 10-16 (crown height) | Likely male | Indet.          |  |                                     |
| Bulgan, Khutag-Undur sum, Uurgiin Gol 4 1-064-04A (036A)                 | Bronze Age, 1200-700 BCE (Deer Stone/Khirigsuur) | 13-15 (crown height) | Likely male | Indet.          |  |                                     |
| Bulgan, Khutag-                                                          | Bronze Age, 1200-700 BCE                         | 11-13 (crown         | Indet.      | Indet.          |  |                                     |

|                                                                                 |                                                           |                                         |                  |        |
|---------------------------------------------------------------------------------|-----------------------------------------------------------|-----------------------------------------|------------------|--------|
| Undur sum,<br>Uurgiin Gol 4<br>1-064-04B<br>(036B)                              | (Deer<br>Stone/Khirigsuur)                                | height)                                 |                  |        |
| Bulgan,<br>Khutag-<br>Undur sum,<br>Uurgiin Gol 4<br>1-064-02<br>(037)          | Bronze Age,<br>1200-700 BCE<br>(Deer<br>Stone/Khirigsuur) | 8-12<br>(crown<br>height)               | Likely<br>male   | Indet. |
| Bulgan,<br>Khutag-<br>Undur sum,<br>Uurgiin Gol 4<br>1-064-05<br>(038)          | Bronze Age,<br>1200-700 BCE<br>(Deer<br>Stone/Khirigsuur) | 8-12<br>(crown<br>height)               | Indet.           | Indet. |
| Bulgan,<br>Khutag-<br>Undur sum,<br>Uurgiin Gol 4<br>1-064-06<br>(039)          | Bronze Age,<br>1200-700 BCE<br>(Deer<br>Stone/Khirigsuur) | 0.5-0.75<br>(eruption)                  | Indet.<br>(Juv.) | Indet. |
| Khuvsgul,<br>Tumurbulag<br>sum, Zunii<br>Gol K3 (040)                           | Bronze Age,<br>1200-700 BCE<br>(Deer<br>Stone/Khirigsuur) | 10-14<br>(crown<br>height)              | Male             | Indet. |
| Khuvsgul,<br>Tumurbulag<br>sum, Zunii<br>Gol DS 4<br>(041)                      | Bronze Age,<br>1200-700 BCE<br>(Deer<br>Stone/Khirigsuur) | 9-14<br>(crown<br>height)               | Female           | Indet. |
| Khuvsgul,<br>Tumurbulag<br>sum, Zunii<br>Gol DS 7<br>(042)                      | Bronze Age,<br>1200-700 BCE<br>(Deer<br>Stone/Khirigsuur) | 3.5-4<br>(eruption,<br>crown<br>height) | Likely<br>male   | Absent |
| Khuvsgul,<br>Galt sum,<br>Khushuutin<br>Am F. 18<br>(043)                       | Bronze Age,<br>1200-700 BCE<br>(Deer<br>Stone/Khirigsuur) | 6-8<br>(crown<br>height)                | Indet.           | Indet. |
| Khuvsgul,<br>Shine-Ider<br>sum,<br>Tsokhiotin<br>Ovoo (044)                     | Bronze Age,<br>1200-700 BCE<br>(Deer<br>Stone/Khirigsuur) | ~1<br>(eruption)                        | Indet.<br>(Juv.) | Indet. |
| Bayankhong<br>or,<br>Erdenetsogt<br>sum, Bor<br>Shoroonii<br>Am HM1<br>(045)    | Bronze Age,<br>1200-700 BCE<br>(Deer<br>Stone/Khirigsuur) | 14-17<br>(crown<br>height)              | Male             | Absent |
| Khuvsgul,<br>Renchinlkhu<br>mbe sum,<br>Zeerdegchin<br>giin Khushuu<br>FB (046) | Bronze Age,<br>1200-700 BCE<br>(Deer<br>Stone/Khirigsuur) | 0.75-1<br>(eruption)                    | Indet.<br>(Juv.) | Indet. |

|                                                               |                                                  |                      |               |                 |                                                   |
|---------------------------------------------------------------|--------------------------------------------------|----------------------|---------------|-----------------|---------------------------------------------------|
| Khuvsgul, Renchinlkhumbe sum, Zeerdegchigiin Khushuu FA (047) | Bronze Age, 1200-700 BCE (Deer Stone/Khirigsuur) | 10-15 (crown height) | Male          | Absent          |                                                   |
| Khuvsgul, Renchinlkhumbe sum, Targan Nuur Feature 1 (048)     | Bronze Age, 1200-700 BCE (Deer Stone/Khirigsuur) | 11-12 (crown height) | Indet.        | Indet.          |                                                   |
| Uvs, Zuunkhangai sum, ZK 1-4 (049)                            | Bronze Age, 1200-700 BCE (Deer Stone/Khirigsuur) | 2.5-3 (eruption)     | Likely male   | Indet.          |                                                   |
| Uvs, Zuunkhangai sum, ZK 257-3 (050)                          | Bronze Age, 1200-700 BCE (Deer Stone/Khirigsuur) | 14-17 (crown height) | Likely male   | Absent          |                                                   |
| Uvs, Zuunkhangai sum, ZK 1-3 (051)                            | Bronze Age, 1200-700 BCE (Deer Stone/Khirigsuur) | 20+ (crown height)   | Indet.        | Absent          |                                                   |
| Uvs, Zuunkhangai sum, ZK1-1 (052)                             | Bronze Age, 1200-700 BCE (Deer Stone/Khirigsuur) | 0.5-0.75 (eruption)  | Indet. (Juv.) | Present (upper) | Mostly complete (Lower right fractured)           |
| Uvs, Zuunkhangai sum, ZK1-2 (053)                             | Bronze Age, 1200-700 BCE (Deer Stone/Khirigsuur) | ~0.75 (eruption)     | Indet. (Juv.) | Present (upper) | Halfway complete (Upper missing, lower complete). |
| Uvs, Zuunkhangai sum, ZK257-4 (054)                           | Bronze Age, 1200-700 BCE (Deer Stone/Khirigsuur) | ~2 (eruption)        | Indet. (Juv.) | Indet.          |                                                   |
| Uvs, Zuunkhangai sum, ZK257-1 (055)                           | Bronze Age, 1200-700 BCE (Deer Stone/Khirigsuur) | ~4 (eruption)        | Indet.        | Indet.          |                                                   |
| Bayankhongor, Erdenetsogt sum, Shatar Chuluu DS 1 (056)       | Bronze Age, 1200-700 BCE (Deer Stone/Khirigsuur) | 13-14 (crown height) | Likely male   | Absent          |                                                   |
| Bayankhongor, Erdenetsogt sum, Shatar Chuluu KS 1 (057)       | Bronze Age, 1200-700 BCE (Deer Stone/Khirigsuur) | 6-11 (crown height)  | Likely male   | Absent          |                                                   |
| Bulgan, Khutag-Undur sum, K75-3 (058)                         | Bronze Age, 1200-700 BCE (Deer Stone/Khirigsuur) | 6-10 (crown height)  | Likely male   | Indet.          |                                                   |

|                                                                   |                                                  |                     |               |        |
|-------------------------------------------------------------------|--------------------------------------------------|---------------------|---------------|--------|
| Bulgan, Khutag-Undur sum, Darkhan Uul K75-2 (059)                 | Bronze Age, 1200-700 BCE (Deer Stone/Khirigsuur) | 3-4 (eruption)      | Likely male   | Indet. |
| Bulgan, Khutag-Undur sum, K75-10 (060)                            | Bronze Age, 1200-700 BCE (Deer Stone/Khirigsuur) | 0.75-1 (eruption)   | Indet. (Juv.) | Indet. |
| Bulgan, Khutag-Undur sum, K75-1 (061)                             | Bronze Age, 1200-700 BCE (Deer Stone/Khirigsuur) | 1-2 (eruption)      | Indet. (Juv.) | Indet. |
| Bulgan, Khutag-Undur sum, K75-4 (062)                             | Bronze Age, 1200-700 BCE (Deer Stone/Khirigsuur) | ~10 (incisor morph) | Likely male   | Indet. |
| Bayankhongor, Shatar Chuluu DS 2 (067)                            | Bronze Age, 1200-700 BCE (Deer Stone/Khirigsuur) | 9-10 (crown height) | Indet.        | Indet. |
| Khuvsgul aimag, Alag-Erdene sum, Khushuutiin Devseg DS F-3 (083)  | Bronze Age, 1200-700 BCE (Deer Stone/Khirigsuur) | 9-14 (crown height) | Indet.        | Indet. |
| Khuvsgul aimag, Alag-Erdene sum, Khushuutiin Devseg DS F-1 (084)  | Bronze Age, 1200-700 BCE (Deer Stone/Khirigsuur) | 7-10 (crown height) | Indet.        | Indet. |
| Khuvsgul aimag, Alag-Erdene sum, Khushuutiin Devseg DS F-2A (085) | Bronze Age, 1200-700 BCE (Deer Stone/Khirigsuur) | 1-2 (eruption)      | Indet.        | Indet. |
| Tuv, Zaamar sum, Ulaan Khadnii Am AD 41 feature 3 (090)           | Bronze Age, 1200-700 BCE (Deer Stone/Khirigsuur) | 7-9 (crown height)  | Indet.        | Indet. |
| Tuv, Zaamar sum, Ulaan Khadnii Am AD 41 feature 2 (091)           | Bronze Age, 1200-700 BCE (Deer Stone/Khirigsuur) | ~5 (eruption)       | Indet.        | Indet. |
| Bulgan, Khutag-Undur, Uurgiin Gol Khirisguur 75/76                | Bronze Age, 1200-700 BCE (Deer Stone/Khirigsuur) | 7-10 (crown height) | Likely male   | Indet. |

|                                                                                    |                                                  |                              |               |                  |                                                                               |                                    |
|------------------------------------------------------------------------------------|--------------------------------------------------|------------------------------|---------------|------------------|-------------------------------------------------------------------------------|------------------------------------|
| Indet.(092)                                                                        |                                                  |                              |               |                  |                                                                               |                                    |
| Bulgan, Khutag-Undur sum, K76-7 (093)                                              | Bronze Age, 1200-700 BCE (Deer Stone/Khirigsuur) | 5-9 (eruption, crown height) | Indet.        | Indet.           |                                                                               |                                    |
| Bayankhong or, Gurvanbulag sum, Morin Mort Feature 2 (095)                         | Bronze Age, 1200-700 BCE (Deer Stone/Khirigsuur) | 16+ (incisor morph)          | Female        | Absent           |                                                                               |                                    |
| Bayankhong or, Ulziit sum, Shorgooljin Bulsh (Ant Shaped Burial), Bulgan Uul (078) | Bronze Age, 1500-700 BCE (Shape Burial)          | 7-11 (crown height)          | Indet.        | Indet.           |                                                                               |                                    |
| Bayankhong or, Erdenetsogt sum, Bor Shoroonii Am Slab Grave 2-1-2 (068)            | Early Iron Age, 800-300 BCE (Slab Burial)        | 1-2 (eruption)               | Indet. (Juv.) | Alveolus (upper) | Complete                                                                      | Y (UR, UL)                         |
| Bayankhong or, Erdenetsogt sum, Bor Shoroonii Am Slab Grave 2-1-1 (070)            | Early Iron Age, 800-300 BCE (Slab Burial)        | 1-2 (eruption)               | Likely male   | Alveolus (upper) | Complete                                                                      | Y (LL), NO (UL, LR), POSSIBLE (UR) |
| Bayankhong or, Erdenetsogt sum, Bor Shoroonii Am, Slab Grave 2-1-6 (072)           | Early Iron Age, 800-300 BCE (Slab Burial)        | 11-20+ (crown height)        | Likely female | Absent           |                                                                               |                                    |
| Bayankhong or, Erdenetsogt sum, Bor Shoroonii Am, Slab Grave 2-1-3 (073)           | Early Iron Age, 800-300 BCE (Slab Burial)        | 2-2.5 (eruption)             | Indet. (Juv.) | Alveolus (upper) | Lower jaw fractured but complete, upper R fractured but complete, UL complete | Y (UL), NO (UR)                    |
| Bayankhong or, Erdenetsogt sum, Bor Shoroonii Am, Slab Grave 2-1-7                 | Early Iron Age, 800-300 BCE (Slab Burial)        | 0.5-0.75 (eruption)          | Indet. (Juv.) | Indet.           |                                                                               |                                    |

|                                                                      |                                           |                                    |               |                  |          |                                           |  |
|----------------------------------------------------------------------|-------------------------------------------|------------------------------------|---------------|------------------|----------|-------------------------------------------|--|
| (074)                                                                |                                           |                                    |               |                  |          |                                           |  |
| Bayankhong or, Erdenetsogt sum, Bor Shoroonii Am, Slab Grave 2 (077) | Early Iron Age, 800-300 BCE (Slab Burial) | 4-7 (crown height)                 | Indet.        | Indet.           |          |                                           |  |
| Bayan Ulgii, Tsengel sum, Khuiten Gol Delta 2-2 (Biluut 2-2) (012)   | Early Iron Age, 600-300 BCE (Pazyryk)     | 2-2.5 (eruption)                   | Indet. (Juv.) | Alveolus (both)  | Complete | YES (UL, LR), NO (UR), TOOTH PRESENT (LL) |  |
| Bayan Ulgii, Tsengel sum, Khuiten Gol Delta 2-1 (Biluut 2-1) (013)   | Early Iron Age, 600-300 BCE (Pazyryk)     | 14-15 (crown height)               | Male          | Absent           |          |                                           |  |
| Khovd, Mankhan sum, Takhilt THL 64.65 (071)                          | Xiongnu (200 BCE-100 CE)                  | 9-11 (crown height, incisor morph) | Male          | Absent           |          |                                           |  |
| Bulgan aimag, Dashinchilen sum, Elst-Ar, Burial 14 (079)             | Xiongnu (200 BCE-100 CE)                  | 0.75-1 (eruption)                  | Indet. (Juv.) | Alveolus (upper) | Complete | Y(UL), NO (UR)                            |  |
| Bulgan aimag, Dashinchilen sum, Elst-Ar, Burial 11 (080)             | Xiongnu (200 BCE-100 CE)                  | 15+ (incisor morph)                | Likely female | Absent           |          |                                           |  |
| Orkhon, Jargalant sum, Airagiin Gozgor, Burial 2 (086)               | Late Xiongnu (ca. 50-150 CE)              | 2-2.5 (eruption)                   | Indet. (Juv.) | Alveolus (lower) | Indet.   | Y (LR), NO (LL)                           |  |
| Orkhon, Jargalant sum, Airagiin Gozgor, Burial 84(094)               | Late Xiongnu (ca. 50-150 CE)              | 8-12 (crown height)                | Male          | Indet.           |          |                                           |  |
| Khovd, Myangad sum, Ulaan-Unet Cave Burial (087)                     | Post-Xiongnu (100 CE-500 CE)              | 4-4.5 (eruption)                   | Male          | Present (both)   |          |                                           |  |
| Bayan Ulgii, Tsengel sum, Khuiten Gol Delta Turkic                   | Turkic Khaganate (500 CE-800 CE)          | 8-9 (incisor morph)                | Male          | Absent           |          |                                           |  |

burial (011)

Bulgan  
aimag,  
Dashinchilen  
sum,  
Dundgozgor,  
Burial 10  
(081)

Turkic Khaganate  
(500 CE-800 CE)

8-13  
(incisor  
morph)

Male

Indet.

Arkhangai  
aimag,  
Khotont  
sum, Ovor  
Khavtsaliin  
Am (082)

Turkic Khaganate  
(500 CE-800 CE)

4-7  
(eruption,  
incisor  
morph.)

Male

Alveolus  
(upper)

Broken and  
possibly fell  
out, specimen  
could not be  
relocated to  
clarify

Table S2. Dental and cranial osteological data for horses used in Taylor and Tuvshinjargal (2018). Legend: (+) = present, (-) = absent, L = left, R = right, LP2 = lower second premolar, UP 2 = upper second premolar, LL = Lower Left, LR = Lower Right, UL = Upper Left, UR = Upper Right, Anthr. = anthropogenic, Nat. Mal. = natural malocclusion, morph. = morphology, indet. = indeterminate, poss. = possible

| ID      | Era            | Provenience                                                       | Est. age in years (basis) | Est. sex    | Premaxilla depth (mm) |        | Left-Right | Nasal remodeling | LP2 Bevel (mm) |       | UP2 bevel | Bevel cause    | Enamel exposure |   | Morph. Indicative of biting? | Enamel chip |     | Notes                                  |
|---------|----------------|-------------------------------------------------------------------|---------------------------|-------------|-----------------------|--------|------------|------------------|----------------|-------|-----------|----------------|-----------------|---|------------------------------|-------------|-----|----------------------------------------|
|         |                |                                                                   |                           |             | Left                  | Rright |            |                  | Left           | Right |           |                | L               | R |                              | L           | R   |                                        |
| NMM 001 | Bronze Age-DSK | Khuvsgul, Tsagaan Uul sum, Khushuutin Gol DS Feature 2            | 14-15 (wear)              | LIKELY MALE | 0.186                 | 0.882  | -0.696     |                  | 0              | 0     | + (R)     | Anthr. (upper) |                 |   | No                           | +           | +   | Concavity to lower LP2 anterior margin |
| NMM 002 | Bronze Age-DSK | Khuvsgul, Tsagaan Uul sum, Bor Hujiriin Gol 1 Feature 2           | 14-15 (wear)              | indet.      |                       |        |            |                  | 0              |       | + (L, R)  | Anthr. (upper) |                 |   |                              |             |     | Greaves effect (UL)                    |
| NMM 003 | Bronze Age-DSK | Khuvsgul, Tsagaan Uul sum, Khushuutin Gol DS Feature 3            | 20+ (wear)                | LIKELY MALE | 1.762                 | 2.331  | -0.569     | +                |                | 0     |           |                |                 |   | No                           |             |     |                                        |
| NMM 008 | Bronze Age-DSK | Bayan Ulgii, Tsengel sum, On Khad KS                              | 6-7 (wear)                | MALE        | 0.758                 | 0.889  | -0.131     |                  | 1.8            | 2.27  |           | Nat. mal.      | + (L)           | + | No                           |             |     |                                        |
| NMM 009 | Bronze Age-DSK | Khuvsgul, Renchinkhumbe sum, Tsatstain Khushuu DS Feature 2       | 20+ (wear)                | MALE        | 0.356                 |        |            | -                |                |       |           |                |                 |   |                              |             |     |                                        |
| NMM 016 | Bronze Age-DSK | Zavkhan, Shiluustei sum, Daagan Del DS                            | 20+ (wear)                | FEMALE      |                       |        |            |                  | 2.46           | 1.2   |           | Nat. mal.      |                 | + | No                           | +           | (L) |                                        |
| NMM 017 | Bronze Age-DSK | Khuvsgul, Alag-Erdene sum, Ulaan Tolgoi DS 4 feature 6            | 11-18 (wear)              | LIKELY MALE |                       |        |            |                  | 0              |       |           |                |                 |   |                              |             |     |                                        |
| NMM 020 | Bronze Age-DSK | Tuv, Zaamar sum, Ulaan Khadnii Am 40 feature 3                    | 10-12 (wear)              | indet.      |                       |        |            |                  |                |       |           |                |                 |   |                              |             |     |                                        |
| NMM 022 | Bronze Age-DSK | Tuv, Zaamar sum, Ulaan Khadnii Am AD 40 feature 4                 | 10-14 (wear)              | indet.      |                       |        |            |                  |                |       |           |                |                 |   |                              |             |     |                                        |
| NMM 023 | Bronze Age-DSK | Tuv, Zaamar sum, Ulaan Khadnii Am AD 40 feature 5                 | 10-15 (wear)              | MALE        |                       |        |            |                  | 0              | 0     |           |                |                 |   |                              |             |     |                                        |
| NMM 025 | Bronze Age-DSK | Arkhangai, Undur-Ulaan sum, Jargalantyn Am F4 2011 Khanui Valley  | 8-13 (wear)               | indet.      |                       |        |            |                  | 0              |       |           |                |                 |   |                              |             |     |                                        |
| NMM 027 | Bronze Age-DSK | Khuvsgul, Alag-Erdene sum, Ulaan Tolgoi DS 5 feature 2            | 6-9 (wear)                | MALE        | 0.613                 |        |            |                  | 0              | 0     |           |                | + (L)           | + | No                           |             |     |                                        |
| NMM 028 | Bronze Age-DSK | Khuvsgul, Renchinkhumbe sum, Zeerdegchingiin Khushuu KS F1 (2006) | 11-12 (wear)              | MALE        | 0                     |        |            |                  | 0              | 2.41  |           | Indet.         | + (L)           | + | No                           | +           | +   |                                        |
| NMM 029 | Bronze Age-DSK | Khuvsgul, Galt sum, Nukhtiin Am Mound 1 feature 1                 | (8-9),(7-8)               | MALE        |                       |        |            |                  |                |       |           |                |                 |   |                              |             |     |                                        |
| NMM 030 | Bronze Age-DSK | Arkhangai, Undoor Ulaan sum, Urt Bulagyn KS KYRI 21               | 11-16 (wear)              | MALE        | 0.702                 |        |            |                  | 8.524          | 5.26  |           | Nat. mal       |                 |   |                              |             |     |                                        |
| NMM 031 | Bronze Age-DSK | Khuvsgul, Galt sum, Nukhtiin Am Deer Stone Site Feature 1         | 11-13 (wear)              | LIKELY MALE |                       |        |            |                  |                |       |           |                |                 | + |                              |             |     |                                        |
| NMM 034 | Bronze Age-DSK | Khuvsgul, Tumurbulag sum, Zunii Gol A1F3                          | 11-14 (wear)              | Indet.      |                       |        |            |                  | 2.34           | 1.44  |           | Nat. mal       | + (U)           |   | No                           | +           | (L) |                                        |
| NMM 035 | Bronze Age-DSK | Bulgan, Khutag-Undur sum, Uurgiin Gol 4 1-064-03                  | 10-16 (wear)              | LIKELY MALE |                       |        |            |                  | 0              |       |           |                |                 |   |                              |             | +   | (L)                                    |
| NMM     | Bronze         | Bulgan, Khutag-Undur sum,                                         | 13-15                     | LIKELY      |                       |        |            |                  | 0              | 0     |           |                |                 |   |                              |             | +   |                                        |



|          |                |                                                         |                   |             |       |       |          |                |          |       | (U)      |                                        |        |     |    |
|----------|----------------|---------------------------------------------------------|-------------------|-------------|-------|-------|----------|----------------|----------|-------|----------|----------------------------------------|--------|-----|----|
| 036A     | Age-DSK        | Uurgiin Gol 4 1-064-04A                                 | (wear)            | MALE        |       |       |          |                |          |       |          |                                        |        |     |    |
| NMM 036B | Bronze Age-DSK | Bulgan, Khutag-Undur sum, Uurgiin Gol 4 1-064-04B       | 11-13 (wear)      | LIKELY MALE |       |       |          |                |          |       |          |                                        |        |     |    |
| NMM 037  | Bronze Age-DSK | Bulgan, Khutag-Undur sum, Uurgiin Gol 4 1-064-02        | 8-12 (wear)       | Indet.      | 1.59  | 1.33  |          | Indet.         | + (L)    | + (L) | Yes      |                                        |        |     |    |
| NMM 038  | Bronze Age-DSK | Bulgan, Khutag-Undur sum, Uurgiin Gol 4 1-064-05        | 8-12 (wear)       | LIKELY MALE | 0     | 1.61  |          | Indet.         |          |       | No       | +                                      | +      |     |    |
| NMM 040  | Bronze Age-DSK | Khuvsgul, Tumurbulag sum, Zunii Gol K3                  | 10-14 (wear)      | MALE        | 3.73  | 2.25  | + (L, R) | Anthr. (upper) |          |       | No       |                                        |        |     |    |
| NMM 041  | Bronze Age-DSK | Khuvsgul, Tumurbulag sum, Zunii Gol DS 4                | 9-14 (wear)       | NO          | 1.64  | 1.29  | + (L, R) | Indet.         | + (U)    |       | No       | +                                      | (L)    |     |    |
| NMM 042  | Bronze Age-DSK | Khuvsgul, Tumurbulag sum, Zunii Gol DS 7                | 3.5-4 (eruption)  | LIKELY MALE |       |       |          |                |          |       |          | + (L)                                  | +      | (L) | No |
| NMM 043  | Bronze Age-DSK | Khuvsgul, Galt sum, Khushuutin Am F. 18                 | 6-8 (wear)        | Indet.      |       |       |          |                |          |       |          |                                        |        |     |    |
| NMM 045  | Bronze Age-DSK | Bayankhongor, Erdenetsogt sum, Bor Shoroonii Am HM1     | 14-17 (wear)      | MALE        | 0.368 | 0     | 0.83     | Nat mal.       |          |       | No       | Concavity to lower LP2 anterior margin |        |     |    |
| NMM 047  | Bronze Age-DSK | Khuvsgul, Renchinkhumbe sum, Zeerdegchingiin Khushuu FA | 10-15 (wear)      | MALE        | 0     | 0     | 0        |                | + (U, L) | +     | (L)      | No                                     |        |     |    |
| NMM 048  | Bronze Age-DSK | Khuvsgul, Renchinkhumbe sum, Targan Nuur Feature 1      | 11-12 (wear)      | Indet.      |       |       |          |                |          |       |          |                                        |        |     |    |
| NMM 049  | Bronze Age-DSK | Uvs, Zuunkhangai sum, ZK 1-4                            | 2.5-3 (eruption)  | LIKELY MALE | 0     | 0.131 | -0.131   |                |          |       | No       |                                        |        |     |    |
| NMM 050  | Bronze Age-DSK | Uvs, Zuunkhangai sum, ZK 257-3                          | 14-17 (wear)      | LIKELY MALE | 0     | 2.14  |          | Nat mal.       |          |       |          |                                        |        |     |    |
| NMM 051  | Bronze Age-DSK | Uvs, Zuunkhangai sum, ZK 1-3                            | 20+ (wear)        | Indet.      | 0     | 0     |          |                |          |       | No       |                                        |        |     |    |
| NMM 055  | Bronze Age-DSK | Uvs, Zuunkhangai sum, ZK257-1                           | ~4 (eruption)     | Indet.      |       |       |          |                |          |       |          |                                        |        |     |    |
| NMM 056  | Bronze Age-DSK | Bayankhongor, Erdenetsogt sum, Shatar Chuluu DS 1       | 13-14 (wear)      | LIKELY MALE | 0.332 |       | Poss.    | 2.64           | 1.37     |       | Nat mal. | +                                      | (U)    |     |    |
| NMM 057  | Bronze Age-DSK | Bayankhongor, Erdenetsogt sum, Shatar Chuluu KS 1       | 6-11 (wear)       | LIKELY MALE | 0     |       |          |                | 1.98     |       | Nat mal. | No                                     | +      | (L) |    |
| NMM 058  | Bronze Age-DSK | Bulgan, Khutag-Undur sum, K75-3                         | 6-10 (wear)       | LIKELY MALE |       |       |          |                |          |       |          | 1.53                                   | Indet. | No  |    |
| NMM 059  | Bronze Age-DSK | Bulgan, Khutag-Undur sum, K75-2                         | 3-4 (eruption)    | LIKELY MALE |       |       |          |                |          |       |          |                                        |        |     |    |
| NMM 062  | Bronze Age-DSK | Bulgan, Khutag-Undur sum, K75-4                         | ~10 (root morph.) | LIKELY MALE |       |       |          |                |          |       |          |                                        |        |     |    |
| NMM 066  | Bronze Age-DSK | Uvs, Zuunkhangai sum, Khurdleyiin Am                    | 7-8 (wear)        | Indet.      |       |       |          |                |          |       |          |                                        |        |     |    |
| NMM 067  | Bronze Age-DSK | Bayankhongor, Shatar Chuluu DS 2                        | 9-10 (wear)       | Indet.      |       |       |          |                |          |       |          |                                        |        |     |    |
| NMM      | Bronze         | Khuvsgul aimag, Alag-Erdene                             | 9-14              | Indet.      |       |       |          |                |          |       |          |                                        |        |     |    |

|         |           |                                |                     |        |       |       |        |   |      |        |  |      |       |     |     |     |     |     |     |                        |                  |
|---------|-----------|--------------------------------|---------------------|--------|-------|-------|--------|---|------|--------|--|------|-------|-----|-----|-----|-----|-----|-----|------------------------|------------------|
| 083     | Age-DSK   | sum, Khushuutiin Devseg DS F-3 | (wear)              |        |       |       |        |   |      |        |  |      |       |     |     |     |     |     |     |                        |                  |
| NMM     | Bronze    | Khuvsgul aimag, Alag-Erdene    | 7-10                | Indet. |       |       |        |   |      |        |  |      |       |     |     |     |     |     |     |                        |                  |
| 084     | Age-DSK   | sum, Khushuutiin Devseg DS F-1 | (wear)              |        |       |       |        |   |      |        |  |      |       |     |     |     |     |     |     |                        |                  |
| NMM     | Bronze    | Tuv, Zaamar sum, Ulaan Khadnii | 7-9 (wear)          | Indet. |       |       |        |   |      |        |  |      |       |     |     |     |     |     |     |                        |                  |
| 090     | Age-DSK   | Am AD 41 feature 3             |                     |        |       |       |        |   |      |        |  |      |       |     |     |     |     |     |     |                        |                  |
| NMM     | Bronze    | Tuv, Zaamar sum, Ulaan Khadnii | ~5                  | Indet. |       |       |        |   |      |        |  |      |       |     |     |     |     |     |     |                        |                  |
| 091     | Age-DSK   | Am AD 41 feature 2             | (eruption)          |        |       |       |        |   |      |        |  |      |       |     |     |     |     |     |     |                        |                  |
| NMM     | Bronze    | Bulgan, Khutag-Undur, Uurgiin  | 7-10                | LIKELY |       |       |        |   |      |        |  |      |       |     |     |     |     |     |     |                        |                  |
| 092     | Age-DSK   | Gol Khirisguur 75/76           | (wear)              | MALE   | 1.96  | 1.68  |        |   |      | Indet. |  |      |       |     |     |     |     |     |     |                        |                  |
| NMM     | Bronze    | Bulgan, Khutag-Undur sum,K76-  | 5-9                 | Indet. |       |       |        |   |      |        |  |      |       |     |     |     |     |     |     |                        |                  |
| 093     | Age-DSK   | 7                              | (eruption/<br>wear) |        |       |       |        |   |      |        |  |      |       |     |     |     |     |     |     |                        |                  |
| IMH     | Contemp.  | Lexington, KY                  | 18+                 | LIKELY | 1.022 | 1.172 | -0.15  | - |      |        |  |      |       |     |     |     |     |     |     |                        |                  |
| 2008.10 | American  |                                | (wear)              | MALE   |       |       |        |   |      |        |  |      |       |     |     |     |     |     |     |                        |                  |
| 1       |           |                                |                     |        |       |       |        |   |      |        |  |      |       |     |     |     |     |     |     |                        |                  |
| IMH     | Contemp.  | Lexington, KY                  | 25 (hist.           |        | 0.291 | 0.278 | 0.013  | - |      |        |  |      |       |     |     |     |     |     |     |                        |                  |
| Hanover | American  |                                | records)            | MALE   |       |       |        |   |      |        |  |      |       |     |     |     |     |     |     |                        |                  |
|         |           |                                |                     |        |       |       |        |   |      |        |  |      |       |     |     |     |     |     |     |                        |                  |
| IMH     | Contemp.  | Lexington, KY                  | 25 (hist.           |        | 1.182 | 0.91  | 0.272  | - |      |        |  |      |       |     |     |     |     |     |     |                        |                  |
| Indraff | American  |                                | records)            | MALE   |       |       |        |   |      |        |  |      |       |     |     |     |     |     |     |                        |                  |
|         |           |                                |                     |        |       |       |        |   |      |        |  |      |       |     |     |     |     |     |     |                        |                  |
| IMH     | Contemp.  | Lexington, KY                  | 25 (hist.           |        | 0.507 | 0.484 | 0.023  | - |      |        |  |      |       |     |     |     |     |     |     |                        |                  |
| Lexingt | American  |                                | records)            | MALE   |       |       |        |   |      |        |  |      |       |     |     |     |     |     |     |                        |                  |
| on      |           |                                |                     |        |       |       |        |   |      |        |  |      |       |     |     |     |     |     |     |                        |                  |
| IMH     | Contemp.  | Lexington, KY                  | 4 (hist.            |        | NA    | 0.637 | NA     | - |      |        |  |      |       |     |     |     |     |     |     |                        |                  |
| Sysonby | American  |                                | records)            | MALE   |       |       |        |   |      |        |  |      |       |     |     |     |     |     |     |                        |                  |
| MSB     | Contemp.  | Albuquerque, NM roadside find  | ~10-11              | MALE   | 0.862 | 0.684 | 0.178  | - |      |        |  |      |       |     |     |     |     |     |     |                        |                  |
| 193704  | American  | (gelding)                      | (wear)              |        |       |       |        |   |      |        |  |      |       |     |     |     |     |     |     |                        |                  |
| NMNH    | Contemp.  | Haleb                          | 8 (hist.            | MALE   | 0.259 | 0.314 | -0.055 |   |      |        |  |      |       |     |     |     |     |     |     |                        |                  |
| 172454  | American  |                                | records)            |        |       |       |        |   |      |        |  |      |       |     |     |     |     |     |     |                        |                  |
| NMNH    | Contemp.  | Percheron Stallion             | ~6 (wear)           | MALE   | 1.103 | 1.169 | -0.066 |   |      |        |  |      |       |     |     |     |     |     |     |                        |                  |
| 174960  | American  |                                |                     |        |       |       |        |   |      |        |  |      |       |     |     |     |     |     |     |                        |                  |
| NMNH    | Contemp.  | US College of Veterinary       | 18+                 | FEMALE | 0.351 | 0.348 | 0.003  |   |      |        |  |      |       |     |     |     |     |     |     |                        |                  |
| 174968  | American  | Surgeons, Washington DC        | (wear)              |        |       |       |        |   |      |        |  |      |       |     |     |     |     |     |     |                        |                  |
| NMNH    | Contemp.  | Kidron                         | 35 (hist.           | MALE   | 0.793 | 0.821 | -0.028 |   |      |        |  |      |       |     |     |     |     |     |     |                        |                  |
| 270900  | American  |                                | records)            |        |       |       |        |   |      |        |  |      |       |     |     |     |     |     |     |                        |                  |
| NMNH    | Contemp.  | Baird Farm, Carlisle, PA       | ~9 (wear)           | MALE   | 0.282 | 0.309 | -0.027 |   |      |        |  |      |       |     |     |     |     |     |     |                        |                  |
| 843     | American  |                                |                     |        |       |       |        |   |      |        |  |      |       |     |     |     |     |     |     |                        |                  |
| CMH 1   | Contemp.  | Ulaanbaatar                    | ~4                  | FEMALE | 0.279 | 0.552 | -0.273 | - |      |        |  |      |       |     |     |     |     |     |     |                        |                  |
|         | Mongolian |                                | (eruption)          |        |       |       |        |   |      |        |  |      |       |     |     |     |     |     |     |                        |                  |
| CMH 2   | Contemp.  | Bayankhongor, Gurvanbulag      | 18+                 | MALE   | 0.214 | 1.203 | -0.989 | + | 3.19 | 3.43   |  | Nat  | + (L) |     | Yes |     | +   | +   |     | Pronounced concavity   |                  |
|         | Mongolian | sum                            | (wear)              |        |       |       |        |   |      |        |  | mal. |       |     |     | (U, | (U, | (L) | (L) |                        | to LLP2 anterior |
|         |           |                                |                     |        |       |       |        |   |      |        |  |      |       |     |     |     |     |     |     |                        | margin           |
| CMH 3   | Contemp.  | Tuv, Khustai Nuruu             | 5+                  | MALE   | 0.522 | 0.592 | -0.07  | - |      |        |  |      |       |     |     |     |     |     |     |                        |                  |
|         | Mongolian |                                | (eruption)          |        |       |       |        |   |      |        |  |      |       |     |     |     |     |     |     |                        |                  |
| CMH 4   | Contemp.  | Tuv, Gun-Galuut                | 16+                 | MALE   | 0.326 | 0.639 | -0.313 | - | 1.5  | 3.13   |  | Nat  | + (L) | +   | Yes |     | +   | +   |     | Concavity to lower LP2 |                  |
|         | Mongolian |                                | (wear)              |        |       |       |        |   |      |        |  | mal. |       | (L) |     | (L) | (L) | (L) |     |                        | anterior margin  |
| CMH 5   | Contemp.  | Tuv, Terelj (near Erdene sum)  | ~4.5                | MALE   | 0.401 | 0.272 | 0.129  | - |      |        |  |      |       |     |     |     |     |     |     |                        |                  |
|         | Mongolian |                                | (eruption)          |        |       |       |        |   |      |        |  |      |       |     |     |     |     |     |     |                        |                  |
| CMH 6   | Contemp.  | Tuv, Terelj                    | 5+                  | MALE   | 0.641 | 0.537 | 0.104  | - |      |        |  |      |       |     |     |     |     |     |     |                        |                  |
|         | Mongolian |                                | (eruption)          |        |       |       |        |   |      |        |  |      |       |     |     |     |     |     |     |                        |                  |
| CMH 7   | Contemp.  | Tuv., Terelj                   | 13-16               | MALE   | 0.561 | 0.686 | -0.125 | + |      |        |  |      |       |     |     |     |     |     |     |                        |                  |
|         | Mongolian |                                | (wear)              |        |       |       |        |   |      |        |  |      |       |     |     |     |     |     |     |                        |                  |

|                 |                     |                                            |                    |        |       |       |        |       |      |      |  |       |   |     |                           |
|-----------------|---------------------|--------------------------------------------|--------------------|--------|-------|-------|--------|-------|------|------|--|-------|---|-----|---------------------------|
| CMH 8           | Contemp. Mongolian  | Tuv, Khustai Nuruu                         | 11-12 (wear)       | MALE   | 0.413 | 0.763 | -0.35  | -     |      |      |  |       |   |     |                           |
| CMH 9           | Contemp. Mongolian  | Uvurkhangai, Bat-Ulzii                     | 16+ (wear)         | FEMALE | 0     | 0     | 0      | -     | 0    | 0    |  | + (L) | + | Yes | Bowing out of lower teeth |
| CMH 10          | Contemp. Mongolian  | Uvurkhangai, Bat-Ulzii                     | 5+ (eruption)      | FEMALE | 0     | 0     | 0      | +     |      |      |  |       |   |     |                           |
| CMH 11          | Contemp. Mongolian  | Uvurkhangai, Bat-Ulzii                     | ~7 (wear)          | FEMALE | NA    | NA    | NA     |       |      |      |  | + (L) | + | No  |                           |
| CMH 12          | Contemp. Mongolian  | Uvurkhangai, Bat-Ulzii                     | 4 (eruption)       | MALE   | 0.395 | 0.271 | 0.124  | +     | 0    |      |  | + (L) |   | No  |                           |
| CMH 13          | Contemp. Mongolian  | Uvurkhangai, Bat-Ulzii                     | 5+ (eruption)      | MALE   | 0     | 0     | 0      | -     |      |      |  |       |   |     |                           |
| CMH 14          | Contemp. Mongolian  | Gobi-Altai, Biger                          | 5+ (eruption)      | MALE   | NA    | NA    | NA     |       | 2.59 | 1.71 |  | + (L) | + | Yes | Occlusal concavity LLP2   |
| CMH 15          | Contemp. Mongolian  | Tuv, Khustai Nuruu                         | 8-9 (wear)         | MALE   | 0.422 | 0.627 | -0.205 | Poss. |      |      |  |       |   |     |                           |
| KNNP Przewalski | Contemp. Przewalski | Tuv, Khustai Nuruu                         | ~6 (wear)          | MALE   | 0     | 0     | 0      | -     |      |      |  |       |   |     |                           |
| MSB 54743       | Contemp. Przewalski | Albuquerque, NM                            | ~5-6 (wear)        | MALE   | 0.289 | 0.194 | 0.095  | -     |      |      |  |       |   |     |                           |
| NMNH 238111     | Contemp. Przewalski | Washington, D.C - National Zoological Park | ~5-6 (wear)        | MALE   | 0     | 0     | 0      | -     |      |      |  |       |   |     |                           |
| NMNH 311033     | Contemp. Przewalski | Washington, D.C - National Zoological Park | 18+ (wear)         | FEMALE | 0.188 | 0.248 | -0.06  | -     |      |      |  |       |   |     |                           |
| NMNH 582088     | Contemp. Przewalski | Washington, D.C - National Zoological Park | 6 (hist. Records)  | FEMALE | 0.342 | 0     | 0.342  | -     |      |      |  |       |   |     |                           |
| NMNH 582467     | Contemp. Przewalski | Washington, D.C - National Zoological Park | ~8 (wear)          | FEMALE | 0.086 | 0.144 | -0.058 | -     |      |      |  |       |   |     |                           |
| NMNH 582910     | Contemp. Przewalski | Washington, D.C - National Zoological Park | ~7 (wear)          | MALE   | 0.754 | 0.678 | 0.076  | -     |      |      |  |       |   |     |                           |
| MSB 146537      | Feral American      | Albuquerque, NM                            | ~5 (eruption/wear) | FEMALE | 0     | 0     | 0      | -     |      |      |  |       |   |     |                           |
| MSB 150587      | Feral American      | Albuquerque, NM                            | ~6 (wear)          | FEMALE | 0     | 0     | 0      | -     |      |      |  |       |   |     |                           |
| NMNH 268938     | Feral American      | Chincoteague Island                        | 7-8 (wear)         | FEMALE | 0.238 | 0.301 | -0.063 | -     |      |      |  |       |   |     |                           |
| NMNH 302898     | Feral American      | Assateague Island                          | 10-11 (wear)       | FEMALE | 0.182 | 0.15  | 0.032  | -     |      |      |  |       |   |     |                           |
| NMNH 395432     | Feral American      | Assateague Island                          | 18+ (wear)         | FEMALE | 0.302 | 0     | 0.302  | -     |      |      |  |       |   |     |                           |
| NMNH 295180     | Feral American      | Assateague Island                          | ~5 (eruption/wear) | Indet. | 0.61  | 0.45  | 0.138  |       |      |      |  |       |   |     |                           |

|         |                      |                                                                             |                  |        |       |       |        |          |      |      |          |          |       |   |     |                        |
|---------|----------------------|-----------------------------------------------------------------------------|------------------|--------|-------|-------|--------|----------|------|------|----------|----------|-------|---|-----|------------------------|
| NMM 013 | Pazyryk              | Bayan Ulgii, Tsengel sum, Khuiten Gol Delta 2-1 Pazyryk burial (Biluut 2-1) | 14-15 (wear)     | MALE   | 1.306 | 0.95  | 0.356  |          | 7.35 |      | + (L, R) | Anthr.   | + (U) |   | Yes |                        |
| NMM 071 | Xiongnu              | Khovd, Mankhan sum, Takhilt THL 64.65 Royal Tomb                            | 9-11 (wear)      | MALE   | 0.667 | 0.856 | -0.189 | Possible | 6.86 | 5.37 | + (L, R) | Anthr.   | + (U) | + |     | Greaves effect (lower) |
| NMM 080 | Xiongnu              | Bulgan aimag, Dashinchilen sum, Elst-Ar, Burial 11                          | 15+ (wear)       | FEMALE | 0     | 0.911 | -0.911 | Possible | 0    | 0    |          |          | + (L) | + | Yes | Concavity (LR)         |
| NMM 094 | Xianbei              | Orkhon, Jargalant sum, Airagiin Gozgor, Burial 84                           | 8-12 (wear)      | MALE   | 0.57  | NA    | NA     | -        | 0.66 | 0.79 |          | Nat mal. | + (L) | + | Yes | +                      |
| NMM 011 | Turkic Khaganate     | Bayan Ulgii, Tsengel sum, Khuiten Gol Delta Turkic burial                   | 8-9 (wear)       | MALE   | 1.03  | 0.852 | 0.178  | +        | 9.81 | 8.22 | + (L, R) | Anthr.   | + (L) | + | Yes |                        |
| NMM 081 | Turkic Khaganate     | Bulgan aimag, Dashinchilen sum, Dundgozgor, Burial 10                       | 8-13 (wear)      | MALE   | NA    | NA    | NA     |          | 6.83 | 4.84 |          | Indet.   |       |   | No  |                        |
| NMM 082 | Turkic Khaganate     | Arkhangai aimag, Khotont sum, Ovur Khartsaliin Am                           | 4-5 (eruption)   | MALE   | 0.714 | 0     | 0.714  | -        | 3.12 | 0.77 |          | Nat mal. | + (L) | + | Yes | +                      |
| NMM 087 | 10th Century/Khitans | Khovd, Myangad sum, Ulaan-Unet Cave Burial                                  | 4-4.5 (eruption) | MALE   | 0.206 | NA    | NA     | +        |      |      |          |          |       |   |     |                        |
